# Supplementary material for: Modeling and Simulation of the Economics of Mining in the Bitcoin Market
Source: PubMed Central journal article supplement (PMC5074464; doi:10.1371/journal.pone.0164603), 2016-10-21
Supplement: pone.0164603.s003.pdf [file pone.0164603.s003.pdf]

The file "S2 Data.txt" contains the value of the hash rate in the real Bitcoin network from September 1st, 2010 to September 30th, 2015.

Note that data in the file "S2 Data.txt" is carriage return--separated.
