# Supplementary material for: Modeling and Simulation of the Economics of Mining in the Bitcoin Market
Source: PubMed Central journal article supplement (PMC5074464; doi:10.1371/journal.pone.0164603), 2016-10-21
Supplement: pone.0164603.s005.pdf [file pone.0164603.s005.pdf]

The file "S4 Data.txt" contains the value of simulated Bitcoin price from September 1st, 2010 to September 30th, 2015.

Note that data in the file "S4 Data.txt" is carriage return--separated.
