# Supplementary material for: Modeling and Simulation of the Economics of Mining in the Bitcoin Market
Source: PubMed Central journal article supplement (PMC5074464; doi:10.1371/journal.pone.0164603), 2016-10-21
Supplement: pone.0164603.s006.pdf [file pone.0164603.s006.pdf]

The file "S5 Data.txt" contains data about traders. Exactly data stored in this file is the following:

- crypto cash of the Random traders,
- fiat cash of the Random traders,
- crypto cash of the Chartists,
- fiat cash of the Chartists,
- crypto cash of Miners,
- fiat cash of Miners,
- average of the total hashing capability in the network across all traders,
- average of the total energy consumption in the network across all traders,
- total hashing capability in the network,
- total energy consumption in the network,
- average of the bitcoin mined in the network across all miners.

Note that data in "S5 Data.txt" is stored as follows:

- to each variable corresponds a row of data separated by Tab characters. They are the values of the variable at each simulation step,
- each row of data, associated to a given variable, ends in a carriage return.

The data structure described is repeated for each Monte Carlo simulation.
