# Supplementary material for: Modeling and Simulation of the Economics of Mining in the Bitcoin Market
Source: PubMed Central journal article supplement (PMC5074464; doi:10.1371/journal.pone.0164603), 2016-10-21
Supplement: pone.0164603.s008.pdf [file pone.0164603.s008.pdf]

The file "S7 Data.txt" contains the number of Miners in the simulated market from September 1st, 2010 to September 30th, 2015 for all Monte Carlo simulations.

Note that data in the file "S7 Data.txt" is carriage return--separated.
